# Supplementary material for: A photoluminescent organosuperelastic crystal of 7-amino-4-methylcoumarin
Source: Royal Society of Chemistry journal article supplement (doi:10.1039/d1ce00359c), 2021-01-01
Supplement: d1ce00359c4.pdf [file d1ce00359c4.pdf]

## Supplementary information

### A Photoluminescent Organosuperelastic Crystal of 7-Amino-4-Methylcoumarin

Toshiyuki Sasaki, Subham Ranjan, Satoshi Takamizawa\*

Department of Materials System Science, Graduate School of Nanobioscience, Yokohama City University, 22-2 Seto, Kanazawa-ku, Yokohama, Kanagawa 236-0027, Japan

staka@yokohama-cu.ac.jp

### Table of contents

|                             |    |
|-----------------------------|----|
| Mechanical characterization | S2 |
| Crystallographic studies    | S4 |
| Supporting references       | S6 |

### Other supplementary material

**Movie S1.** Superelastic behavior of a single crystal of **1** sheared by tweezers under PW light.

**Movie S2.** Superelastic behavior of a single crystal of **1** sheared by tweezers under PW light (left) and PW+UV light (right).

**Movie S3.** Superelastic behavior of a single crystal of **1** sheared by a glass jig under PW light (left) and UV light (right).

## Mechanical characterization

**Table S1.** Mechanical parameters of superelastic molecular crystals.

| Entry                    | $\sigma_f$ / MPa <sup>a</sup> | $\sigma_r$ / MPa <sup>a</sup> | $E_s$ / kJ m <sup>-3b</sup> | $\eta$ <sup>c</sup> | $\chi$ <sup>d</sup> | $\theta$ / ° <sup>e</sup> |
|--------------------------|-------------------------------|-------------------------------|-----------------------------|---------------------|---------------------|---------------------------|
| <b>1-PW</b>              | 0.63                          | 0.04                          | 4                           | 0.07                | 0.01                | 3.8                       |
| <b>1-UV</b>              | 0.63                          | 0.04                          | 3                           | 0.06                | 0.01                | 3.8                       |
| <b>TPA</b> <sup>f</sup>  | 0.50                          | 0.46                          | 62                          | 0.93                | 0.13                | 6.5                       |
| <b>FBA</b> <sup>g</sup>  | 0.07                          | 0.01–0.03                     | 12                          | 0.29                | 0.26                | 27.8                      |
| <b>BPPB</b> <sup>h</sup> | 0.53                          | 0.42                          | 50                          | 0.79                | 0.10                | 5.3                       |
| <b>MNA</b> <sup>i</sup>  | 0.03                          | 0.01                          | 4                           | 0.39                | 0.20                | 20.5                      |
| <b>PDA</b> <sup>j</sup>  | 0.49                          | 0.28                          | 110                         | 0.61                | 0.29                | 23.9                      |
| <b>DCB</b> <sup>k</sup>  | 0.03                          | 0.02                          | 8                           | 0.77                | 0.28                | 18.6                      |
| <b>FPC</b> <sup>l</sup>  | 0.35                          | 0.03                          | 8                           | 0.08                | 0.04                | 16.3                      |
| <b>MPU</b> <sup>m</sup>  | 0.25                          | 0.16                          | 8                           | 0.64                | 0.04                | 2.9                       |
| <b>7Cl</b> <sup>n</sup>  | 1.53                          | 0.66                          | 560                         | 0.43                | 0.51                | 42.1                      |
| <b>TCNB</b> <sup>o</sup> | 0.11                          | 0.04                          | 15                          | 0.35                | 0.19                | 21.4                      |
| <b>MNBA</b> <sup>p</sup> | 0.69                          | 0.38                          | 31                          | 0.55                | 0.06                | 3.3                       |
| <b>PFPI</b> <sup>q</sup> | 0.28                          | 0.19                          | 72                          | 0.69                | 0.31                | 22.2                      |
| <b>TCIB</b> <sup>r</sup> | 0.18                          | 0.02                          | 1.6                         | 0.09                | 0.02                | 5.84~                     |

<sup>a</sup>Effective shear stress for deformation: proceeding in the forward ( $\sigma_f$ ) and reverse ( $\sigma_r$ ) directions.

<sup>b</sup>Energy storage density ( $E_s = W_{out}/V$ ). The symbols  $W_{out}$  and  $V$  represent the output work and volume, respectively, in a deformed region of a specimen during superelastic deformation.

<sup>c</sup>Energy storage efficiency ( $\eta = W_{out}/W_{in}$ ) where  $W_{in}$  represents input work. <sup>d</sup>Superelastic index ( $\chi = 2E_s/(\sigma_f + \sigma_r)$ ).

<sup>e</sup>Representative crystal bending angles: a crystal bending angle is variable depending on a crystal morphology. <sup>f</sup>Terephthalamide.<sup>S1</sup> <sup>g</sup>3,5-difluorobenzoic acid.<sup>S2</sup> <sup>h</sup>5-tetrabutyl-*n*-phosphonium tetraphenylborate.<sup>S3</sup> <sup>i</sup>*N,N*-dimethyl-4-nitroaniline.<sup>S4</sup> <sup>j</sup>Pentadecanoic acid.<sup>S5</sup> <sup>k</sup>1,4-dicyanobenzene.<sup>S6</sup> <sup>l</sup>4,5,7,8,12,13,15,16-octafluoro[2.2]paracyclophane.<sup>S7</sup> <sup>m</sup>1,3-bis(4-methoxyphenyl)urea.<sup>S8</sup> <sup>n</sup>7-chloro-2-(2'-hydroxyphenyl)imidazo[1,2-*a*]pyridine.<sup>S9</sup> <sup>o</sup>1,3,5-tricyanobenzene.<sup>S10</sup> <sup>p</sup>3-methyl-4-nitrobenzoic acid.<sup>S11</sup> <sup>q</sup>*N*-(2,3,4,5,6-pentafluorophenyl)-1-phenylmethanimine.<sup>S12</sup> <sup>r</sup>1,3,5-trichlorobenzene.<sup>S13</sup>

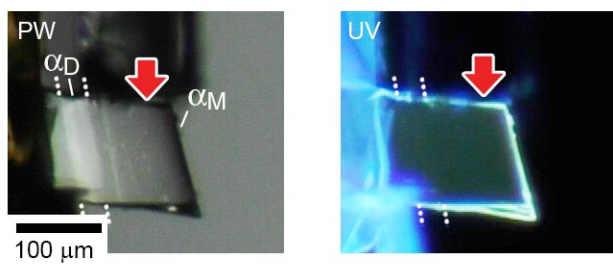

**Figure S1.** Photographic images of a deformed crystal of **1** under PW light (left) and UV light (right).

## Crystallographic studies

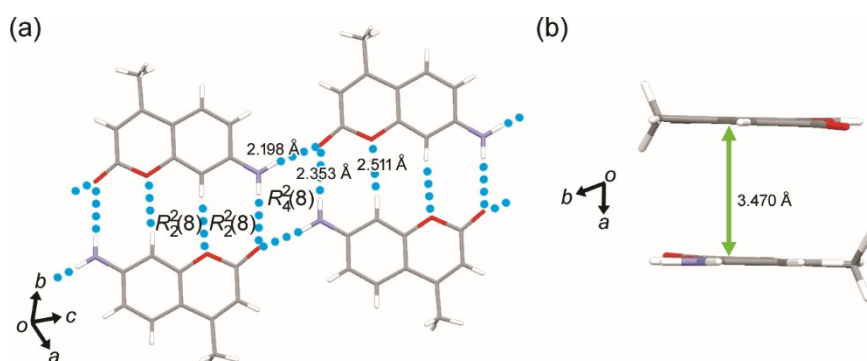

**Figure S2.** (a) Hydrogen bonding networks with graph set denotations<sup>S14–S17</sup> and (b)  $\pi$ - $\pi$  interactions in the crystalline state.

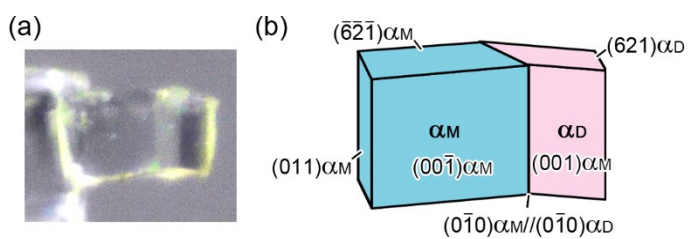

**Figure S3.** (a) A photographic image of a twinned crystal of **1** and (b) its face indices.

**Table S2.** Crystallographic parameters of a mechanically twinned crystal of **1**.

| Sample                                       | Mechanically twinned                           |                                                |
|----------------------------------------------|------------------------------------------------|------------------------------------------------|
| Domain                                       | $\alpha_M$                                     | $\alpha_D$                                     |
| $T / K$                                      | 296                                            | 296                                            |
| Molecular formula                            | C <sub>10</sub> H <sub>9</sub> NO <sub>2</sub> | C <sub>10</sub> H <sub>9</sub> NO <sub>2</sub> |
| Crystal size/mm <sup>3</sup>                 | 0.245x0.124x0.099                              | 0.171x0.115x0.082                              |
| Molecular weight                             | 175.18                                         | 175.18                                         |
| Crystal system                               | triclinic                                      | triclinic                                      |
| Space group                                  | $P\bar{1}$                                     | $P\bar{1}$                                     |
| $a / \text{\AA}$                             | 6.9349(19)                                     | 6.9361(7)                                      |
| $b / \text{\AA}$                             | 7.1467(15)                                     | 7.1569(6)                                      |
| $c / \text{\AA}$                             | 9.558(2)                                       | 9.5654(9)                                      |
| $\alpha / ^\circ$                            | 71.817(6)                                      | 71.825(3)                                      |
| $\beta / ^\circ$                             | 84.968(8)                                      | 84.915(3)                                      |
| $\gamma / ^\circ$                            | 70.026(8)                                      | 69.902(3)                                      |
| $V / \text{\AA}^3$                           | 422.89(18)                                     | 423.58(7)                                      |
| $Z$                                          | 2                                              | 2                                              |
| $D_{\text{calcd}} / \text{Mg m}^{-3}$        | 1.376                                          | 1.374                                          |
| $\mu (\text{Mo K}\alpha) / \text{mm}^{-1}$   | 0.097                                          | 0.097                                          |
| Reflections collected                        | 5217                                           | 5247                                           |
| Independent reflections ( $R_{\text{int}}$ ) | 1468 (0.0610)                                  | 1473 (0.0449)                                  |
| Goodness of fit                              | 1.653                                          | 1.060                                          |
| $R_1 (I > 2\sigma (\text{all data}))$        | 0.1819 (0.2083)                                | 0.0632 (0.0803)                                |
| $wR_2 (I > 2\sigma (\text{all data}))$       | 0.4492 (0.4751)                                | 0.1731 (0.1973)                                |
| Largest diff. peak (hole)/e $\text{\AA}^3$   | 1.328 (-0.538)                                 | 0.281 (-0.225)                                 |
| CCDC No.                                     | 2069188                                        | 2069189                                        |

## Supporting references

- [S1]. S. Takamizawa, Y. Miyamoto, Superelastic Organic Crystals. *Angew. Chem. Int. Ed.* **2014**, *53*, 6970–6973.
- [S2]. S. Takamizawa, Y. Takasaki, Superelastic Shape Recovery of Mechanically Twinned 3,5-Difluorobenzoic Acid Crystals. *Angew. Chem. Int. Ed.* **2015**, *54*, 4815–4817.
- [S3]. S. Takamizawa, Y. Takasaki, Shape-Memory Effect in an Organosuperelastic Crystal. *Chem. Sci.* **2016**, *7*, 1527–1534.
- [S4]. S. Takamizawa, Y. Takasaki, T. Sasaki, N. Ozaki, Superplasticity in an Organic Crystal. *Nat. Commun.* **2018**, *9*, 3984.
- [S5]. S. Takamizawa, Y. Takasaki, Versatile Shape Recoverability of Odd-Numbered Saturated Long-Chain Fatty Acid Crystals. *Cryst. Growth Des.* **2019**, *19*, 1912–1920.
- [S6]. S. Sakamoto, T. Sasaki, A. Sato-Tomita, S. Takamizawa, Shape Rememorization of an Organosuperelastic Crystal via Superelasticity—Ferroelasticity Interconversion. *Angew. Chem. Int. Ed.* **2019**, *58*, 13722–13726.
- [S7]. T. Sasaki, S. Sakamoto, S. Takamizawa, Twinning Organosuperelasticity of a Fluorinated Cyclophane Single Crystal. *Cryst. Growth Des.* **2019**, *10*, 5491–5493.
- [S8]. T. Sasaki, S. Sakamoto, S. Takamizawa, A Multidirectional Superelastic Organic Crystal by Versatile Ferroelastical Manipulation. *Angew. Chem. Int. Ed.* **2020**, *59*, 4340–4343.
- [S9]. T. Mutai, T. Sasaki, S. Sakamoto, I. Yoshikawa, H. Houjou, S. Takamizawa, A Superelastochromic Crystal. *Nat. Commun.* **2020**, *11*, 1824.
- [S10]. T. Sasaki, S. Sakamoto, S. Takamizawa, Flash Shape-Memorization Processing and Inversion of a Polar Direction in a Chiral Organosuperelastic Crystal of 1,3,5-Tricyanobenzene. *Cryst. Growth Des.* **2020**, *20*, 4621–4626.
- [S11]. Y. Takasaki, T. Sasaki, S. Takamizawa, Temperature-Diversified Anisotropic Superelasticity and Ferroelasticity in a 3-Methyl-4-Nitrobenzoic Acid Crystal. *Cryst. Growth Des.* **2020**, *20*, 6211–6216.
- [S12]. T. Sasaki, S. Sakamoto, S. Takamizawa, Twinning-Based Organosuperelasticity and Chirality in a Single Crystal of an Achiral Donor-Acceptor Type Schiff Base Induced by Charge-Transfer Interactions. *Cryst. Growth Des.* **2020**, *20*, 8079–8083.
- [S13]. T. Sasaki, K. Nishizawa, S. Takamizawa, Versatile Organosuperelastic Deformability by Multiple Mechanical Twinning. *Cryst. Growth Des.* **2021**, in press (DOI: 10.1021/acs.cgd.1c00054).
- [S14]. Graph M. C. Etter, Encoding and Decoding Hydrogen-Bond Patterns of Organic Compounds. *Acc. Chem. Res.* **1990**, *23*, 120–126.
- [S15]. J. Bernstein, R. E. Davis, L. Shimoni, N.-L. Chang, Patterns in Hydrogen Bonding: Functionality and Graph Set Analysis in Crystals. *Angew. Chem. Int. Ed. Engl.* **1995**, *34*, 1555–1573.
- [S16]. T. Sasaki, Y. Ida, I. Hisaki, T. Yuge, Y. Uchida, N. Tohnai, M. Miyata, Characterization of Supramolecular Hidden Chirality of Hydrogen-Bonded Networks by Advanced Graph Set

Analysis. *Chem. Eur. J.* **2014**, *20*, 2478–2487.

- [S17]. T. Sasaki, M. Miyata, H. Sato, Helicity and Topological Chirality in Hydrogen-Bonded Supermolecules Characterized by Advanced Graph Set Analysis and Solid-State Vibrational Circular Dichroism Spectroscopy. *Cryst. Growth Des.* **2018**, *18*, 4621–4627.
